# Supplementary material for: Type II Toxin–Antitoxin Systems in the Unicellular Cyanobacterium Synechocystis sp. PCC 6803
Source: PubMed Central journal article supplement (PMC4963859; doi:10.3390/toxins8070228), 2016-07-21
Supplement: toxins-08-00228-s001.pdf [file toxins-08-00228-s001.pdf]

## Supplementary Materials: Type II Toxin–Antitoxin Systems in the Unicellular Cyanobacterium *Synechocystis* sp. PCC 6803

Stefan Kopfmann, Stefanie K. Roesch and Wolfgang R. Hess

**Table S1.** Comparison of toxin and antitoxin DNA sequences using blastn and a cut-off of 65% sequence identity. Each homolog was narrowed down to one ortholog using reciprocal blastp analysis and synteny analysis of the genetic neighborhoods in PCC6803 and PCC6714.

| PCC6803  |                 | PCC6714 | Sequence Identity | PCC6803   |                 | PCC6714 | Sequence Identity |
|----------|-----------------|---------|-------------------|-----------|-----------------|---------|-------------------|
| Toxin    | Homolog Present |         |                   | Antitoxin | Homolog Present |         |                   |
| sll0205  | +               | 66.6    | ssl0385           | +         | 76              |         |                   |
| ssl0258  | –               | -       | ssl0259           | –         | -               |         |                   |
| sll0286  | +               | 86.13   | sll0284           | +         | 89              |         |                   |
| ssr0335  | +               | 43.52   | ssr0336           | –         |                 |         |                   |
| ssl0350a | +               | 71.04   | ssl0350           | +         | 69.92           |         |                   |
| sll0406  | –               | -       | sll0405           | –         | -               |         |                   |
| sll0525  | –               | -       | ssl1004           | –         | -               |         |                   |
| sll0624  | –               | -       | sll0624a          | –         | -               |         |                   |
| sll0658  | +               | 74.25   | ssl1255           | +         | 83              |         |                   |
| slr0664  | –               | -       | ssr1114           | –         | -               |         |                   |
| sll0690  | –               | -       | ssl1300           | –         | -               |         |                   |
| slr0725  | +               | 86      | slr0724           | +         | 85              |         |                   |
| ssl0739  | +               | 74.7    | ssl0738           | +         | 88.11           |         |                   |
| ssr0756  | –               | -       | ssr0755           | –         | -               |         |                   |
| ssr0757  | –               | -       | ssr0757a          | –         | -               |         |                   |
| ssr0761a | –               | -       | ssr0761           | –         | -               |         |                   |
| slr0771  | –               | -       | slr0770           | –         | -               |         |                   |
| slr1062  | –               | -       | slr1062a          | –         | -               |         |                   |
| sll1092  | –               | -       | ssl2138           | –         | -               |         |                   |
| sll1130  | +               | 91      | ssl2245           | +         | 93              |         |                   |
| slr1210  | –               | -       | slr1209           | –         | -               |         |                   |

|          |   |       |          |   |       |
|----------|---|-------|----------|---|-------|
| sll1225  | + | 83.16 | ssl2420  | + | 68.8  |
| slr1241  | - | -     | slr1240  | - | -     |
| ssr1260  | - | -     | ssr1258  | - | -     |
| slr1327  | - | -     | ssr2201  | - | -     |
| ssl1377  | - | -     | ssl1376  | - | -     |
| slr1383  | - | -     | ssr2317  | - | -     |
| sll1400  | - | -     | ssl2733  | - | -     |
| slr1421  | + | 68.73 | ssr2377  | + | 89.28 |
| ssl1493a | - | -     | ssl1493  | - | -     |
| sll1504  | + | 83.6  | sll1505  | + | 65.12 |
| sll1543  | - | -     | ssl2999  | - | -     |
| sll1651  | - | -     | sll1652  | - | -     |
| sll1715  | - | -     | sll1714  | - | -     |
| ssr1766  | - | -     | ssr1765  | - | -     |
| slr1767  | - | -     | ssr2962  | - | -     |
| slr1906  | + | 82.17 | slr1907  | + | 78    |
| sll1912  | + | 69.42 | ssl3615  | + | 57.51 |
| sll1965  | - | -     | ssl3719  | - | -     |
| slr1999  | - | -     | slr1999  | - | -     |
| ssr2066  | - | -     | ssr2067  | - | -     |
| ssl2749  | - | -     | sll1411  | - | -     |
| ssr2755  | - | -     | ssr2754  | - | -     |
| N/K      | - | -     | ssr2784  | - | -     |
| N/K      | - | -     | ssr2784a | - | -     |
| ssl2921  | + | 96    | ssl2920  | + | 94    |
| ssl2923  | + | 89    | ssl2922  | + | 77.22 |
| N/K      | - | -     | ssr3154  | - | -     |
| ssr3572  | - | -     | ssr3571  | - | -     |
| ssr3589  | - | -     | ssr3588  | - | -     |
| sll5003  | - | -     | sll5004  | - | -     |
| slr5017  | - | -     | slr5018  | - | -     |
| ssr5020  | - | -     | slr5021  | - | -     |

|         |   |    |         |   |       |
|---------|---|----|---------|---|-------|
| N/K     | - | -  | ssl5025 | - | -     |
| sll5094 | + | 91 | ssl5095 | + | 90    |
| slr5102 | - | -  | slr5101 | - | -     |
| slr5116 | + | 89 | ssr5117 | + | 94    |
| slr6049 | - | -  | ssr6048 | - | -     |
| slr6057 | - | -  | slr6056 | - | -     |
| slr6100 | - | -  | slr6101 | - | -     |
| sll7003 | + | 93 | ssl7004 | + | 95    |
| ssl7007 | + | 95 | sll7006 | + | 91.08 |
| ssr7017 | - | -  | slr7016 | - | -     |
| sll7030 | - | -  | sll7031 | - | -     |
| N/K     | - | -  | slr7032 | - | -     |
| sll7033 | - | -  | sll7034 | - | -     |
| ssl7039 | - | -  | ssl7038 | - | -     |
| slr7041 | - | -  | ssr7040 | - | -     |
| ssl7046 | - | -  | N/K     | - | -     |
| N/K     | - | -  | ssl7048 | - | -     |
| ssr7072 | - | -  | slr7071 | - | -     |
| ssr7093 | + | 96 | slr7092 | + | 97    |
| sll8007 | - | -  | ssl8008 | - | -     |
| sll8011 | - | -  | sll8012 | - | -     |
| slr8014 | - | -  | ssr8013 | - | -     |

**Table S2.** Homology search of toxin and antitoxin protein sequences using blastp and a cut-off of 30% sequence identity. Each homolog was narrowed down to one ortholog using reciprocal blastp analysis and synteny analysis of the genetic neighborhoods in PCC6803 and PCC6714.

| PCC6803 | PCC6714    | PCC6803                     | PCC6714                     |
|---------|------------|-----------------------------|-----------------------------|
| Toxin   | Homolog    | Antitoxin                   | Homolog                     |
|         | Blastp     | Reciprocal Blastp + Synteny | Blastp                      |
|         |            |                             | Reciprocal Blastp + Synteny |
| sll0205 | D082_05270 | ssl0385                     | D082_05260                  |
| ssl0258 | D082_50470 | ssl0259                     | D082_50460                  |
| sll0286 | D082_22430 | sll0284                     | D082_22420                  |
| ssr0335 | D082_30800 | ssr0336                     | D082_30810                  |

|          |                                   |                                   |          |                        |                        |
|----------|-----------------------------------|-----------------------------------|----------|------------------------|------------------------|
| ssl0350a | D082_30800                        | D082_30800                        | ssl0350  | D082_30810/D082_27220  | D082_30810             |
| slI0406  | -                                 | -                                 | slI0405  | -                      | -                      |
| slI0525  | D082_40900                        | D082_40900                        | ssl1004  | D082_40890             | D082_40890             |
| slI0624  | D082_60470                        | D082_60470                        | slI0624a | D082_60460             | D082_60460             |
| slI0658  | D082_03850/D082_03860; D082_60140 | D082_03850/D082_03860; D082_60140 | ssl1255  | D082_03840; D082_60140 | D082_03840; D082_60140 |
| slr0664  | -                                 | -                                 | ssr1114  | -                      | -                      |
| slI0690  | D082_30840                        | -                                 | ssl1300  | D082_30830             | -                      |
| slr0725  | D082_50930                        | D082_50930                        | slr0724  | D082_50940             | D082_50940             |
| ssl0739  | D082_07310                        | D082_07310                        | ssl0738  | D082_07300             | D082_07300             |
| ssr0756  | D082_40900/D082_05270             | -                                 | ssr0755  | D082_05260             | -                      |
| ssr0757  | -                                 | -                                 | ssr0757a | -                      | -                      |
| ssr0761a | -                                 | -                                 | ssr0761  | -                      | -                      |
| slr0771  | -                                 | -                                 | slr0770  | D082_15400             | D082_15400             |
| slr1062  | D082_17650                        | D082_17650                        | slr1062a | D082_17660             | D082_17660             |
| slI1092  | D082_05270                        | -                                 | ssl2138  | D082_05260             | -                      |
| slI1130  | D082_34540                        | D082_34540                        | ssl2245  | D082_34530             | D082_34530             |
| slr1210  | -                                 | -                                 | slr1209  | D082_15400             | -                      |
| slI1225  | D082_26250                        | D082_26250                        | ssl2420  | D082_26250a            | D082_26250a            |
| slr1241  | -                                 | -                                 | slr1240  | D082_34440             | D082_34440             |
| ssr1260  | D082_50470                        | -                                 | ssr1258  | D082_50460             | -                      |
| slr1327  | D082_40860                        | D082_40860                        | ssr2201  | -                      | -                      |
| ssl1377  | -                                 | -                                 | ssl1376  | -                      | -                      |
| slr1383  | D082_28260                        | D082_28260                        | ssr2317  | D082_28250             | D082_28250             |
| slI1400  | D082_41030                        | D082_41030                        | ssl2733  | D082_41020             | D082_41020             |
| slr1421  | -                                 | -                                 | ssr2377  | D082_13570             | D082_13570             |
| ssl1493a | -                                 | -                                 | ssl1493  | -                      | -                      |
| slI1504  | D082_30880/D082_3900              | D082_30880/D082_3900              | slI1505  | D082_30890             | D082_30890             |
| slI1543  | -                                 | -                                 | ssl2999  | -                      | -                      |
| slI1651  | -                                 | -                                 | slI1652  | -                      | -                      |
| slI1715  | -                                 | -                                 | slI1714  | -                      | -                      |
| ssr1766  | D082_50470                        | D082_50470                        | ssr1765  | D082_50460             | D082_50460             |
| slr1767  | D082_41030                        | -                                 | ssr2962  | D082_41020             | -                      |
| slr1906  | D082_04370                        | D082_04370                        | slr1907  | D082_04380             | D082_04380             |
| slI1912  | D082_12830                        | D082_12830                        | ssl3615  | -                      | -                      |
| slI1965  | -                                 | -                                 | ssl3719  | -                      | -                      |
| slr1999  | -                                 | -                                 | -        | -                      | -                      |

|         |                       |             |          |            |            |
|---------|-----------------------|-------------|----------|------------|------------|
| ssr2066 | -                     | -           | ssr2067  | D082_34430 | D082_34430 |
| ssl2749 | D082_40370            | D082_40370  | sll1411  | D082_40380 | D082_40380 |
| ssr2755 | D082_30870            | -           | ssr2754  | -          | -          |
| N/K     | -                     | -           | ssr2784  | -          | -          |
| N/K     | -                     | -           | ssr2784a | -          | -          |
| ssl2921 | D082_30870            | D082_30870  | ssl2920  | D082_30860 | D082_30860 |
| ssl2923 | D082_30840            | D082_30840  | ssl2922  | D082_30830 | D082_30830 |
| N/K     | -                     | -           | ssr3154  | -          | -          |
| ssr3572 | D082_30870            | -           | ssr3571  | -          | -          |
| ssr3589 | -                     | -           | ssr3588  | -          | -          |
| sll5003 | -                     | -           | sll5004  | -          | -          |
| slr5017 | D082_30880/D082_3900; | -           | slr5018  | D082_30890 | -          |
| ssr5020 | D082_30440a           | D082_30440a | slr5021  | D082_30440 | D082_30440 |
| N/K     | -                     | -           | ssl5025  | D082_08740 | D082_08740 |
| sll5094 | D082_50890            | D082_50890  | ssl5095  | D082_50880 | D082_50880 |
| slr5102 | -                     | -           | slr5101  | -          | -          |
| slr5116 | D082_50980            | D082_50980  | ssr5117  | D082_50970 | D082_50970 |
| slr6049 | D082_50890            | -           | ssr6048  | -          | -          |
| slr6057 | -                     | -           | slr6056  | -          | -          |
| slr6100 | -                     | -           | slr6101  | -          | -          |
| sll7003 | D082_40020            | D082_40020  | ssl7004  | D082_40010 | D082_40010 |
| ssl7007 | D082_60470            | D082_60470  | sll7006  | D082_60460 | D082_60460 |
| ssr7017 | D082_40660            | D082_40660  | slr7016  | D082_40020 | -          |
| sll7030 | -                     | -           | sll7031  | -          | -          |
| N/K     | -                     | -           | slr7032  | D082_30890 | -          |
| sll7033 | -                     | -           | sll7034  | D082_15400 | -          |
| ssl7039 | -                     | -           | ssl7038  | -          | -          |
| slr7041 | -                     | -           | ssr7040  | -          | -          |
| ssl7046 | -                     | -           | N/K      | -          | -          |
| N/K     | -                     | -           | ssl7048  | -          | -          |
| ssr7072 | -                     | -           | slr7071  | -          | -          |
| ssr7093 | D082_40660            | D082_40660  | slr7092  | D082_40670 | D082_40670 |
| sll8007 | -                     | -           | ssl8008  | -          | -          |
| sll8011 | -                     | -           | sll8012  | -          | -          |
| slr8014 | -                     | -           | ssr8013  | -          | -          |
| sll8027 | -                     | -           | ssl8028  | -          | -          |

Table S3. Strains.

| <i>E. coli</i> Strains | Description                                                                                                                                                                                                  | Source     |
|------------------------|--------------------------------------------------------------------------------------------------------------------------------------------------------------------------------------------------------------|------------|
| TOP10 F'               | F'( <i>lacIq</i> , Tn10(TetR)) <i>mcrA</i> Δ( <i>mrr-hsdRMS-mcrBC</i> ) Φ80 <i>lacZ</i> ΔM15 Δ <i>lacX74</i><br><i>recA1 araD139</i> Δ( <i>ara leu</i> ) 7697 <i>galU galK rpsL</i> (StrR) <i>endA1 nupG</i> | Invitrogen |
| M15 [pREP4]            | <i>nal<sup>S</sup> str<sup>S</sup> rif<sup>S</sup> thi lac ara<sup>+</sup> gal<sup>+</sup> mtl<sup>-</sup> f<sup>-</sup> recA<sup>+</sup> uvr<sup>+</sup> lon<sup>+</sup></i>                                | Quiagen    |
| BL21 (DE3) Rosetta™    | F <sup>-</sup> <i>ompT gal dcm lon hsdSB</i> (r <sub>B</sub> <sup>-</sup> m <sub>B</sub> <sup>-</sup> )<br>λ(DE3 [ <i>lacI lacUV5-T7 gene 1 ind1 sam7 nin5</i> ]) [ <i>argU ileY leuW Cam<sup>r</sup></i> ]  | Novagen    |

Table S4. Primers.

| Primer              | Sequence                                        |
|---------------------|-------------------------------------------------|
| sll0525_SphI_FW     | 5'-AGAAGGATTAGCATGCAACTTTTGTGG                  |
| sll0525_BamHI_RV    | 5'-TGGCGATCGACTCTGGATCCTACTCC                   |
| sll1092_SphI_FW     | 5'-AGGAGTATCTGGCATGCATTCTGTTTTG                 |
| sll1092_BamHI_RV    | 5'-AGGTCGCTATGGATCCCAACCACAG                    |
| ssl2923_SphI_FW     | 5'-GAGAAGAGTTCTGCATGCAGTATTTACTAG               |
| ssl2923_BamHI_RV    | 5'-TACTTGGATCCTTGCCATAGGCGATCG                  |
| ssl1004_SacI_FW     | 5'-CGATGAGAGAGCTCTATGATCGGAG                    |
| ssl1004_KpnI_RV     | 5'-GTTTCACGTTAAGGTACCTCAAGATAATGGCCA            |
| ssl2138_SacI_FW     | 5'-CATTAAATTCAAGGAGAGCTCAATGACTACTG             |
| ssl2138_KpnI_RV     | 5'-CAAAACAGGGTACCTTACATATACTCCTC                |
| ssl2922_SacI_FW     | 5'-TTACTTATCCTAGAGGGAGCTCCATGAACAC              |
| ssl2922_KpnI_RV     | 5'-GTATCTAGTAAATAGGTACCTTAGAACTTTCTCG           |
| ssr8013_SacI_FW     | 5'-GGTTGAGCTCCATGACAGCG                         |
| ssr8013_KpnI_RV     | 5'-GTACTTTCACAGGTACCTTACAGATACTTCTC             |
| slr8014_NdeI_FW     | 5'-GTATCTGTAACATATGGTGAAAGTACTTC                |
| slr8014_XhoI_RV     | 5'-ATGGGCCTCGAGATCAAGCTTATTG                    |
| ssl7038_SacI-fw     | 5'-AGAACTATAAGGTGAGCTCAATGGAAACCC               |
| ssl7038_EcoRI-rv    | 5'-AACATTACCTGAATTCGGAGTGTCGTGG                 |
| ssl7039_SphI-fw     | 5'-GGATAACAATAGGGGCATGCTTGAAATCC                |
| ssl7039_BamHI-rv    | 5'-TGAATTGGATCCATAGTTCTTTGGCTAAATC              |
| lpp_T7_TS_RV        | 5'TAATACGACTCACTATAGGGACAGAAGACAGCTGATCGATTTTAG |
| lpp_TS_FW           | 5'-AATGAAAGCTAACTAACTGGTACTGG                   |
| DHFR P1-T7_RV       | 5'-TAATACGACTCACTATAGGGAAAACCAGGCGAGATCGG       |
| DHFR P1_FW          | 5'-ATATACATATGATCAGTCTGATTGC                    |
| DHFR Plasmid seq_FW | 5'-GCTAGTGGTGCTAGCCC                            |
| DHFR Plasmid seq_RV | 5'-CAAGCTTCCGATATAGTTCC                         |
